# Supplementary material
Source: Springer Nature journal article supplement (https://www.springermedizin.de/resource/supplementary/12889_2010_2564_MOESM2_ESM.pdf/9486466)

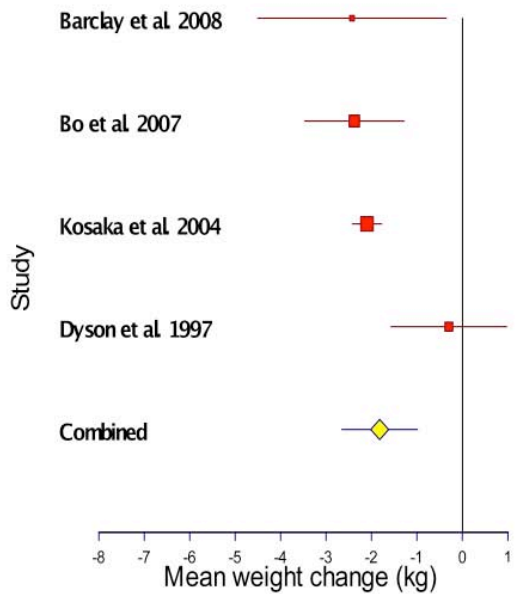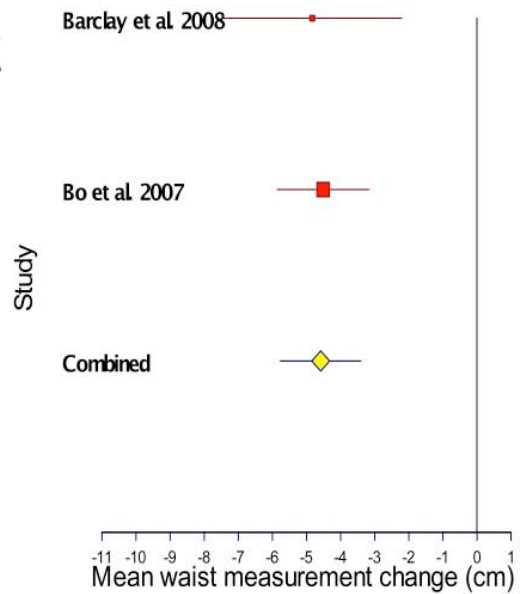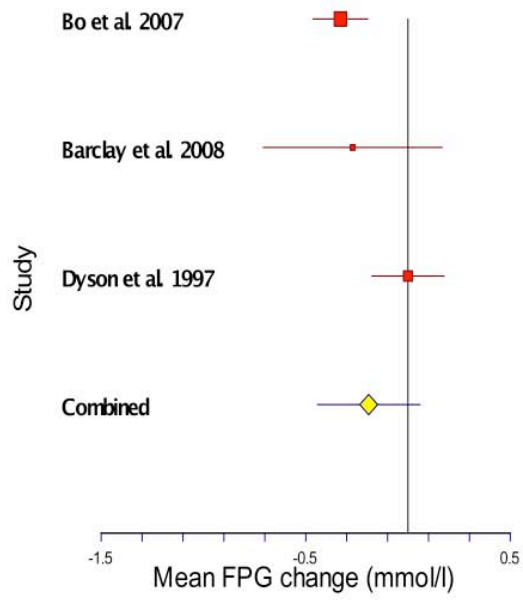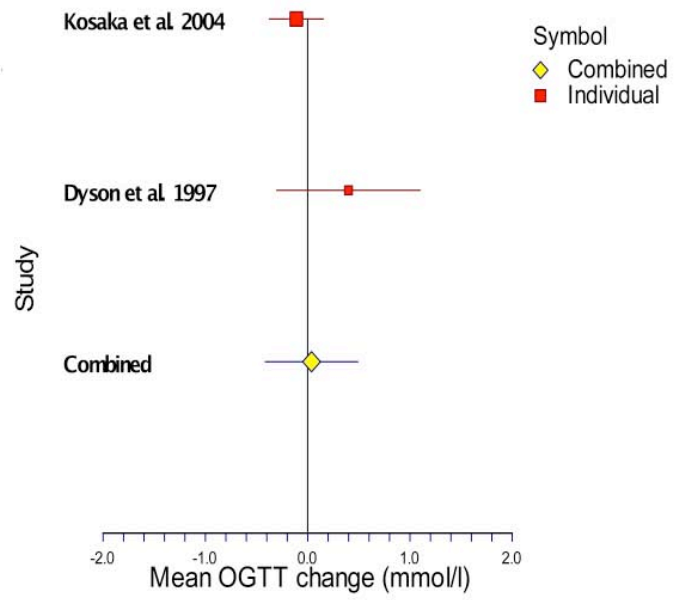

Symbol  
 ◆ Combined  
 ■ Individual

Supplement: MOESM2 [file 9486466]
